1 **DeepCob: Precise and high-throughput analysis of maize cob geom-**  
2 **etry using deep learning with an application in genebank phenomics**

3

4 Lydia Kienbaum<sup>1</sup>, Miguel Correa Abondano<sup>1</sup>, Raul Blas<sup>2</sup>, Karl Schmid<sup>1,3</sup>

5 <sup>1</sup>Institute of Plant Breeding, Seed Science and Population Genetics, University of Hohenheim,  
6 Stuttgart, Germany

7 <sup>2</sup>Universidad Nacional Agraria La Molina (UNALM), Lima, Peru

8 <sup>3</sup>Computational Science Lab, University of Hohenheim, Stuttgart, Germany

9 Corresponding author:

10 Karl Schmid

11 Email: [karl.schmid@uni-hohenheim.de](mailto:karl.schmid@uni-hohenheim.de)

## Abstract

**Background:** Maize cobs are an important component of crop yield that exhibit a high diversity in size, shape and color in native landraces and modern varieties. Various phenotyping approaches were developed to measure maize cob parameters in a high throughput fashion. More recently, deep learning methods like convolutional neural networks (CNN) became available and were shown to be highly useful for high-throughput plant phenotyping. We aimed at comparing classical image segmentation with deep learning methods for maize cob image segmentation and phenotyping using a large image dataset of native maize landrace diversity from Peru.

**Results:** Comparison of three image analysis methods showed that a Mask R-CNN trained on a diverse set of maize cob images was highly superior to classical image analysis using the Felzenszwalb-Huttenlocher algorithm and a Window-based CNN due to its robustness to image quality and object segmentation accuracy ( $r = 0.99$ ). We integrated Mask R-CNN into a high-throughput pipeline to segment both maize cobs and rulers in images and perform an automated quantitative analysis of eight phenotypic traits, including diameter, length, ellipticity, asymmetry, aspect ratio and average RGB values for cob color. Statistical analysis identified key training parameters for efficient iterative model updating. We also show that a small number of 10-20 images is sufficient to update the initial Mask R-CNN model to process new types of cob images. To demonstrate an application of the pipeline we analyzed phenotypic variation in 19,867 maize cobs extracted from 3,449 images of 2,484 accessions from the maize genebank of Peru to identify phenotypically homogeneous and heterogeneous genebank accessions using multivariate clustering.

**Conclusions:** Single Mask R-CNN model and associated analysis pipeline are widely applicable tools for maize cob phenotyping in contexts like genebank phenomics or plant breeding.

**Keywords:** Maize cob, Deep learning, Genebank Phenomics, Object detection, High-throughput plant phenotyping, Image analysis, Genetic resources

## 38 Background

39 High-throughput precision phenotyping of plant traits is rapidly becoming an integral part of plant re-  
40 search, plant breeding, and crop production [1]. This development complements the rapid advances  
41 in genomic methods that, when combined with phenotyping, enable rapid, accurate, and efficient  
42 analysis of plant traits and the interaction of plants with their environment [2]. However, for many  
43 traits of interest, plant phenotyping is still labor intensive or technically challenging. Such a bottle-  
44 neck in phenotyping [3] limits progress in understanding the relationship between genotype and phe-  
45 notype, which is a problem for plant breeding [4]. The phenotyping bottleneck is being addressed by  
46 phenomics platforms that integrate high-throughput automated phenotyping with analysis software  
47 to obtain accurate measurements of phenotypic traits [5, 6]. Existing phenomics platforms cover  
48 multiple spatial and temporal scales and incorporate technologies such as RGB image analysis,  
49 NIRS, or NMR spectroscopy [7, 8, 9]. The rapid and large-scale generation of diverse phenotypic  
50 data requires automated analysis to convert the output of phenotyping platforms into meaningful  
51 information such as measures of biological quantities [10, 11]. Thus, high-throughput pipelines with  
52 accurate computational analysis will realize the potential of plant phenomics by overcoming the phe-  
53 notyping bottleneck.

54 A widely used method for plant phenotyping is image segmentation and shape analysis using geo-  
55 metric morphometrics [12]. Images are captured in standardized environments and then analyzed  
56 either manually or automatically using image annotation methods to segment images and label ob-  
57 jects. The key challenge in automated image analysis is the detection and segmentation of relevant  
58 objects. Traditionally, object detection in computer vision (CV) has been performed using multi-  
59 variate algorithms that detect edges, for example. Most existing pipelines using classical image  
60 analysis in plant phenotyping are species-dependent and assume homogeneous plant material and  
61 standardized images [13, 14, 15]. Another disadvantage of classical image analysis methods is  
62 low accuracy and specificity when image quality is low or background noise is present. Therefore,  
63 the optimal parameters for image segmentation often need to be fine-tuned manually through ex-  
64 perimentation. In recent years, machine learning approaches have revolutionized many areas of  
65 CV such as object recognition [16] and are superior to classical CV methods in many applications  
66 [17]. The success of machine learning in image analysis can be attributed to the evolution of neu-  
67 ral networks from simple architectures to advanced feature-extracting convolutional neural networks  
68 (CNN) [18]. The complexity of CNN could be exploited because deep learning algorithms offered  
69 new and improved training approaches for these more complex method networks. Another advan-  
70 tage of machine learning methods is their robustness to variable image backgrounds and image  
71 qualities when model training is based on a sufficiently diverse set of training images. Although  
72 CNN have been very successful in general image classification and segmentation, their application  
73 in plant phenotyping is still limited to a few species and features. Current applications include plant  
74 pathogen detection, organ and feature quantification, and phenological analysis [19, 20, 9].

75 Maize cobs can be described with few geometric shape and color parameters. Since the size and  
76 shape of maize cobs are important yield components with a high heritability and are correlated  
77 with total yield [21, 22], they are potentially useful traits for selection in breeding programs. High

78 throughput phenotyping approaches are also useful for characterizing native diversity of crop plants  
79 to facilitate their conservation or utilize them as genetic resources [23, 24]. Maize is an excellent  
80 example to demonstrate the usefulness of high throughput phenotyping because of its high genetic  
81 and phenotypic diversity, which originated since its domestication in South-Central Mexico about  
82 9,000 years ago [25, 26, 27]. A high environmental variation within its cultivation range in combina-  
83 tion with artificial selection by humans resulted in many phenotypically divergent landraces [28, 29].  
84 Since maize is one of the most important crops worldwide, large collections of its native diversity  
85 were established in *ex situ* genebanks, whose genetic and phenotypic diversity are now being char-  
86 acterized [30]. This unique pool of genetic and phenotypic variation is threatened by genetic erosion  
87 [31, 32, 33] and understanding its role in environmental and agronomic adaptation is essential to  
88 identify valuable genetic resources and develop targeted conservation strategies.

89 In the context of native maize diversity we present a CNN-based deep learning model implemented  
90 in a robust and widely applicable analysis pipeline for recognizing, semantic labeling and automated  
91 measurements of maize cobs in RGB images for large scale plant phenotyping. Highly variable traits  
92 like cob length, kernel color and number were used for classification of the native maize diversity of  
93 Peru [34] and are useful for the characterization of maize genetic resources because cobs are easily  
94 stored and field collections can be analyzed at a later time point. We demonstrate the application  
95 of image segmentation to photographs of native maize diversity in Peru. So far, cob traits have  
96 been studied for small sets of Peruvian landraces, only such as cob diameter in 96 accessions of  
97 12 Peruvian maize landraces [35], or cob diameter in 59 accessions of 9 highland landraces [36].  
98 Here we use image analysis to obtain cob parameters from 2,484 accessions of the Peruvian maize  
99 genebank hosted at Universidad Nacional Agraria La Molina (UNALM) by automated image analysis.  
100 We also show that the DeepCob image analysis pipeline can be easily expanded to different image  
101 types of maize cobs such as segregating populations resulting from genetic crosses.

## 102 Results

103 **Comparison of image segmentation methods** To address large-scale segmentation of maize  
104 cobs, we compared three different image analysis methods for their specificity and accuracy in de-  
105 tecting and segmenting both maize cobs and measurement rulers in RGB images. Correlations be-  
106 tween true and derived values for cob length and diameter show that Mask R-CNN far outperformed  
107 the classical Felzenszwalb-Huttenlocher image segmentation algorithm and a window-based CNN  
108 (Window-CNN) (Figure 1). For two sets of old (ImgOld) and new (ImgNew) maize cob images (see  
109 Materials and Methods), Mask R-CNN achieved correlations of 0.99 and 1.00, respectively, while  
110 correlation coefficients ranged from 0.14 to 0.93 with Felzenszwalb-Huttenlocher segmentation and  
111 from 0.03 to 0.42 with Window-CNN, respectively. Since Mask R-CNN was strongly superior in  
112 accuracy to the other two segmentation methods, we restricted all further analyses to this method  
113 only.

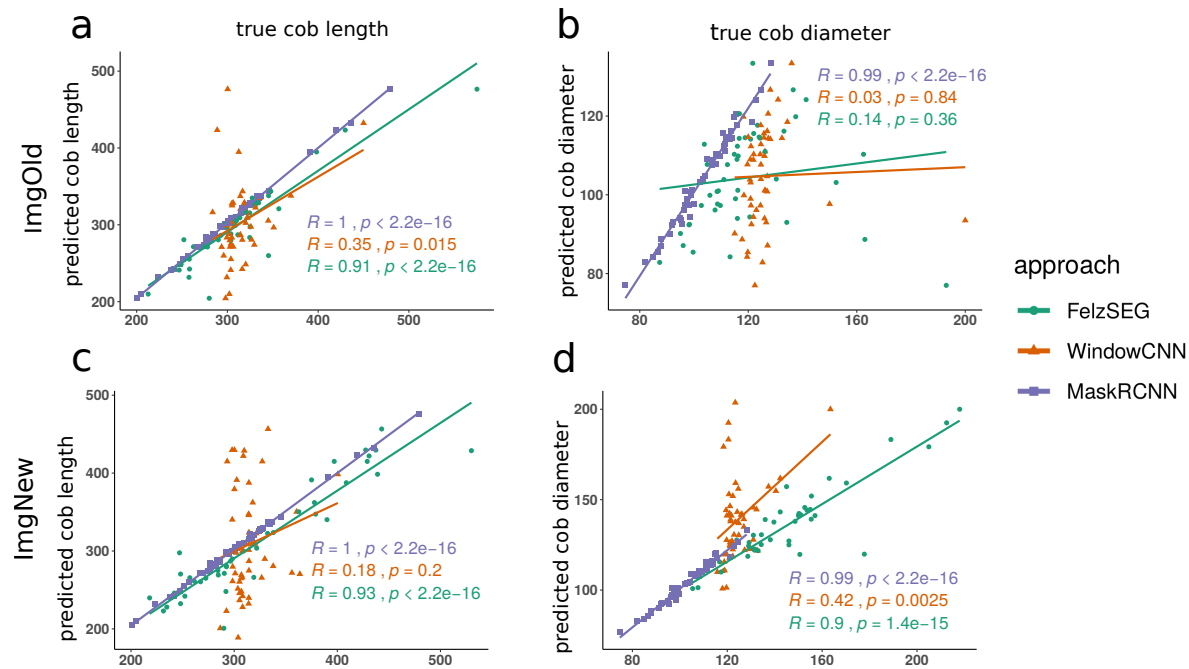

**Figure 1:** Pearson correlation between true and estimated cob length for three image segmentation methods (Felzenszwalb-Huttenlocher segmentation, Window-CNN, Mask R-CNN). True (x-axis) and estimated (y-axis) mean cob length (a,c) and diameter (b,d) per image with each approach, split by dataset, ImgOld and ImgNew are shown. In all cases, *MaskRCNN* achieves the highest correlation of at least 0.99 with the true values.

114 **Parameter optimization of Mask R-CNN** We first describe parameter optimizations during train-  
 115 ing of the Mask R-CNN model based on the old (ImgOld) and new (ImgNew) maize cob image data  
 116 from the Peruvian maize genebank. A total of 90 models were trained, differing by the parameters  
 117 *learning rate*, *total epochs*, *epochs.m*, *mask loss weight*, *monitor*, *minimask* (see Material and Meth-  
 118 ods), using a small (200) and a large (1,000) set of randomly selected images as training data. The  
 119 accuracy of Mask R-CNN detection depends strongly on model parameters, as  $AP@[.5:.95]$  values  
 120 for all models ranged from 5.57 to 86.74 for 200 images and from 10.49 to 84.31 for 1,000 images  
 121 for model training (Supplementary Table S1). Among all 90 models, M104 was the best model for  
 122 maize cob and ruler segmentation with a score of 86.74, followed by models M101, M107, and M124  
 123 with scores of 86.56. All four models were trained with the small image dataset.

124 Given the high variation of the scores, we evaluated the contribution of each training parameter  
 125 to this variation with an ANOVA (Table 1). There is an interaction effect between the size of the  
 126 training set and the total number of epochs trained, as well as an effect of a minimask, which is often  
 127 used as a resizing step of the object mask before fitting it to the deep learning model. The other  
 128 training parameters *learning rate*, *monitoring*, *epochs.m* (mode to train only heads or all layers), and  
 129 *mask loss weight* had no effect on the  $AP@[.5:.95]$  value. The lsmeans show that training without  
 130 *minimask* leads to higher scores and more accurate object detection. Table 1 shows an interaction  
 131 between the size of the training set and the total number of epochs. Model training with 200 images  
 132 over 200 epochs was not different from training over 50 epochs or from model training with 1,000  
 133 images over 200 epochs at  $p < 0.05$ . In contrast, model training over 15 epochs only resulted in  
 134 lower  $AP@[.5:.95]$  values.

**Table 1:** Lsmeans of  $AP@[.5:.95]$  in the ANOVA analysis for Mask R-CNN model parameters *minimask* and the interaction of *training set size*  $\times$  *total number of epochs*. Mean values that share a common letter are not significantly different ( $p < 0.05$ ). Individual  $p$ -values of comparisons are in Supplementary Tables S2 and S3.

| Minimask             |                        | Lsmeans              |
|----------------------|------------------------|----------------------|
| no                   |                        | 79.95 <sup>a</sup>   |
| yes                  |                        | 48.17 <sup>b</sup>   |
| Size of training set | Total number of epochs | Lsmeans              |
| 200                  | 200                    | 72.63 <sup>a</sup>   |
| 200                  | 50                     | 69.97 <sup>ab</sup>  |
| 1000                 | 50                     | 64.37 <sup>bc</sup>  |
| 1000                 | 200                    | 64.17 <sup>abc</sup> |
| 1000                 | 15                     | 62.38 <sup>bc</sup>  |
| 200                  | 15                     | 56.51 <sup>c</sup>   |

135 **Loss behavior of Mask R-CNN during model training** Monitoring loss functions of model com-  
136 ponents (classes, masks, boxes) during model training identifies components that need further ad-  
137 justments to achieve full optimization. Compared to the other components, mask loss contributed  
138 the highest proportion to all losses (Figure 2), which indicates that the most challenging process in  
139 model training and optimization is segmentation by creating masks for cobs and rulers. The best  
140 model M104 shows a decreasing training and validation loss during the first 100 epochs and a ten-  
141 dency for overfitting in additional epochs (Figure 2b). This suggests that model training over 100  
142 epochs is sufficient. Other models like M109 (Figure 2c) exhibit overfitting with a 10-fold higher  
143 validation loss than M104. Instead of learning patterns, the model memorizes training data, which  
144 increases the validation loss and results in weak predictions for object detection and image segmen-  
145 tation.

146 **Visualization of feature maps generated by Mask R-CNN** Although neural networks are con-  
147 sidered a "black box" method, a feature map visualization of selected layers shows interpretable  
148 features of trained networks. In a feature map, high activations correspond to high feature recogni-  
149 tion activity in that area, as shown in Figure 3A for the best model M104. Over several successive  
150 CNN layers, the cob shape is increasingly well detected until, in the last layer (res4a) the feature  
151 map indicates a robust distinction between foreground with the cob and ruler objects and the back-  
152 ground. High activations occur at the top of the cobs (Fig. 3A, res4g layer), which may contribute to  
153 localization. Because the cobs were oriented according to their lower (apical) end in the images, it  
154 may be more difficult for the model to detect the upper edges, which are variable in height. Overall,  
155 the feature maps show that the network learned specific features of the maize cob and the image  
156 background.

157 The Mask R-CNN detection process can be visualized by its main steps, which we demonstrate  
158 using the best model (Figure 3B). The top 50 anchors are output by the Region Proposal Network  
159 (RPN) and the anchored boxes are then further refined. In the early stages of refinement, all boxes

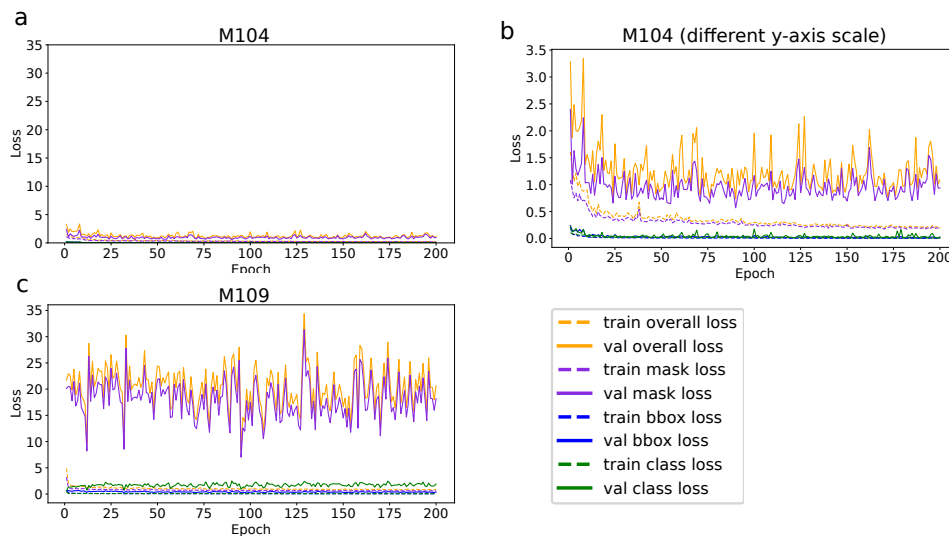

**Figure 2:** Mask R-CNN training and validation losses during training for 200 epochs on ImgOld and ImgNew maize cob images from the Peruvian genebank. a) Loss curves for model M104, which emerged as the best model b) Model M104 with a different scale on the y-axis. The mask loss showed the largest effect on overall loss, indicating that masks are most difficult to optimize. Other losses, like class loss or bounding box loss, are of minor importance. c) Model M109 shows overfitting as indicated by much higher validation losses resulting in an inferior model based on  $AP@[.5:.95]$ .

160 already contain a cob or ruler, but boxes containing the same image element have different lengths  
161 and widths. In later stages, the boxes are further reduced in size and refined around the cobs and  
162 rulers until, in the final stage, mask recognition provides accurate-fitting masks, bounding boxes,  
163 and class labels around each recognized cob and ruler.

164 The best Mask R-CNN model for detection and segmentation of both maize cobs and rulers is  
165 very robust to image quality and variation. This robustness is evident from a representative subset  
166 of ImgOld and ImgNew images that we did not use for training and show a high variation in image  
167 quality, backgrounds and diversity of maize cobs (Figure 4). Both the identification of bounding boxes  
168 and object segmentation are highly accurate regardless of image variability. The only inaccuracies  
169 in the location of bounding boxes or masks occur at the bottom edge of cobs.

170 **Maize model updating on additional image datasets** To extend the use of our model for images  
171 of corn cobs taken under different circumstances and in different environments (e.g., in the field),  
172 we investigated whether updating our maize model for new image types with additional image data  
173 included in the ImgCross and ImgDiv data sufficiently improves the segmentation accuracy of cob  
174 and ruler elements compared to a full training process starting again with the standard COCO model.  
175 We used the best maize model trained on ImgOld and ImgNew data (model M104, hereafter maize  
176 model), which is pre-trained only on the cob and ruler classes. In addition to updating to our maize  
177 model, we updated the COCO model with the same images. In this context, the COCO model serves  
178 as a validation, as it is a standard mask-R CNN model trained on the COCO image data [37], which  
179 contains 80 annotated object classes in 330K images.

180 Overall, model updating using training images significantly improved the  $AP@[.5:.95]$  scores of the

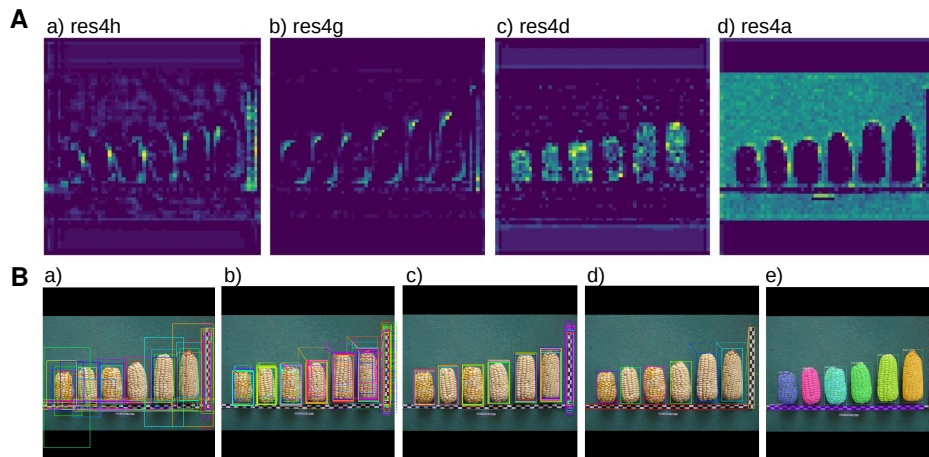

**Figure 3:** Feature map visualizations and improved segmentation throughout learning A) Examples of feature map visualizations on resnet-101 (for an explanation, see Materials and Methods). a) An early layer shows activations around the cob shape and the ruler on the right. b) The next layer shows more clarified cob shapes with activations mainly at the top and bottom of cobs c) A later layer shows different activations inside the cob. d) The latest layer masks the background very well masked from cobs and rulers. B) Visualization of the main detection procedure of Mask R-CNN a) The top 50 anchors obtained from the region proposal network (RPN), after non-max suppression. b), c) and d) show further bounding box refinement and e) shows the output of the detection network: mask prediction, bounding box prediction and class label. All images are quadratic with a black padding because images are internally resized to a quadratic scale for more efficient matrix multiplication operations.

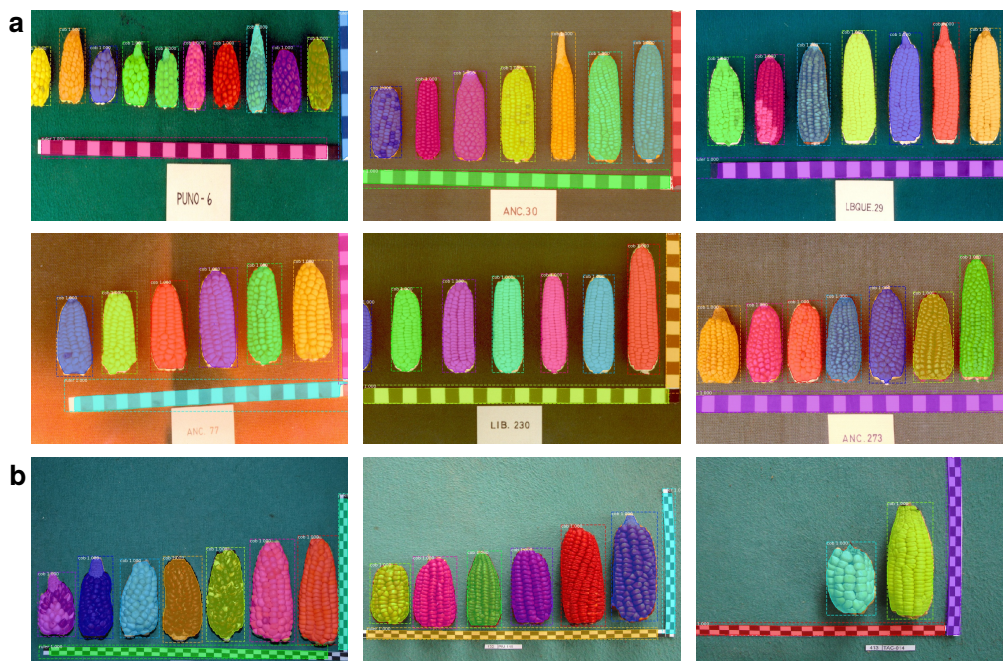

**Figure 4:** Examples of detection and segmentation performance on a representative example of diverse images from the Peruvian maize landrace ImgOld (a) and ImgNew (b) image sets including different cob and background colors.



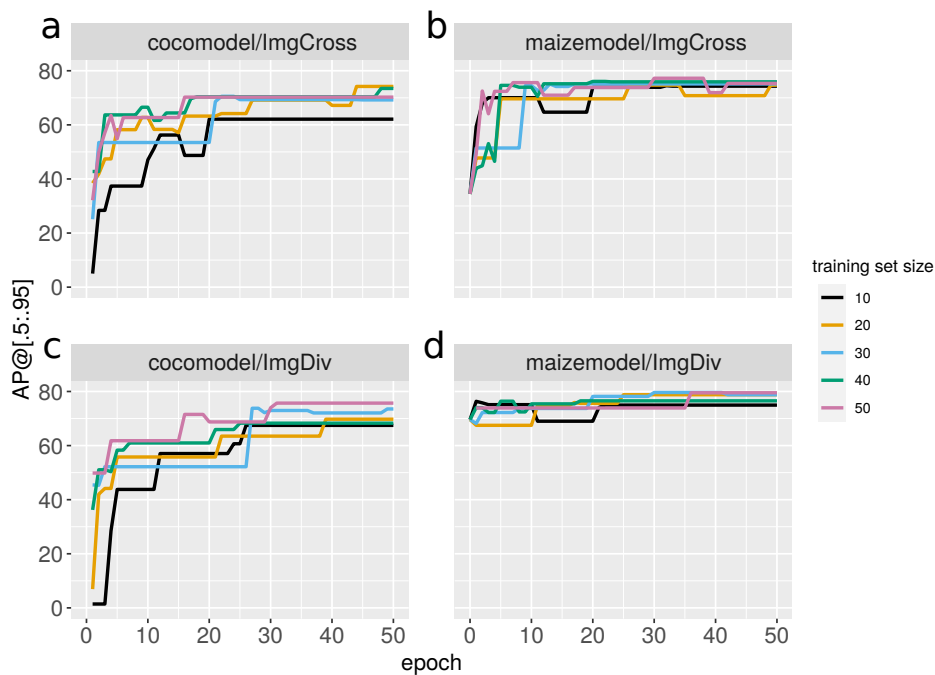

**Figure 5:** Improvement of  $AP@[.5:.95]$  scores during 50 epochs of model updating to different maize cob image datasets (a, b: ImgCross; c, d: ImgDiv). Updating on the COCO initial weights/COCO model (a,c) in comparison to updating on the pre-trained maize model (b,d) depends on different amounts of training images, namely 10, 20, 30, 40 or 50 images.

181 additional image datasets (Figure 5), with scores differing between image sets, initial models, and  
182 training set sizes. With standard COCO model weights (Fig. 6a, c),  $AP@[.5:.95]$  scores were initially  
183 low, down to a value of 0, in which neither cobs nor rulers were detected. However, scores increased  
184 rapidly during up to 0.7 during the first 30 epochs. In contrast, with the pre-trained weights (Fig. 5b,  
185 d) of the maize model  $AP@[.5:.95]$  scores were already high during the first epochs and then rapidly  
186 improved to higher values than with the COCO model. Therefore, object segmentation using ad-  
187 ditional maize cob image data was significantly better with the pre-trained maize model from the  
188 beginning and throughout the model update.

189 Given the high variation in these scores, we determined the contribution of the three factors *starting*  
190 *model*, *training set size* and *training data set* to the observed variation in  $AP@[.5:.95]$  scores with  
191 an ANOVA. In this analysis, the interactions between dataset and starting model were significant.  
192 By accounting for the lsmeans of these significant interactions (Table 2), updating of the pre-trained  
193 maize model than of the COCO model was better in both data sets. With respect to training set sizes,  
194  $AP@[.5:.95]$  scores of maize model were essentially the same for different sizes and were always  
195 higher than of the COCO model. In summary, there is a clear advantage in updating a pre-trained  
196 maize model over the COCO model for cob segmentation with diverse maize cob image sets.

197 **Descriptive of data obtained from cob image segmentation** To demonstrate that the Mask  
198 R-CNN model is suitable for large-scale and accurate image analysis, we present the results of a  
199 descriptive analysis of 19,867 maize cobs that were identified and extracted from the complete set of  
200 images from the Peruvian maize genebank, i.e., the ImgOld and ImgNew data. Here, we focus on the

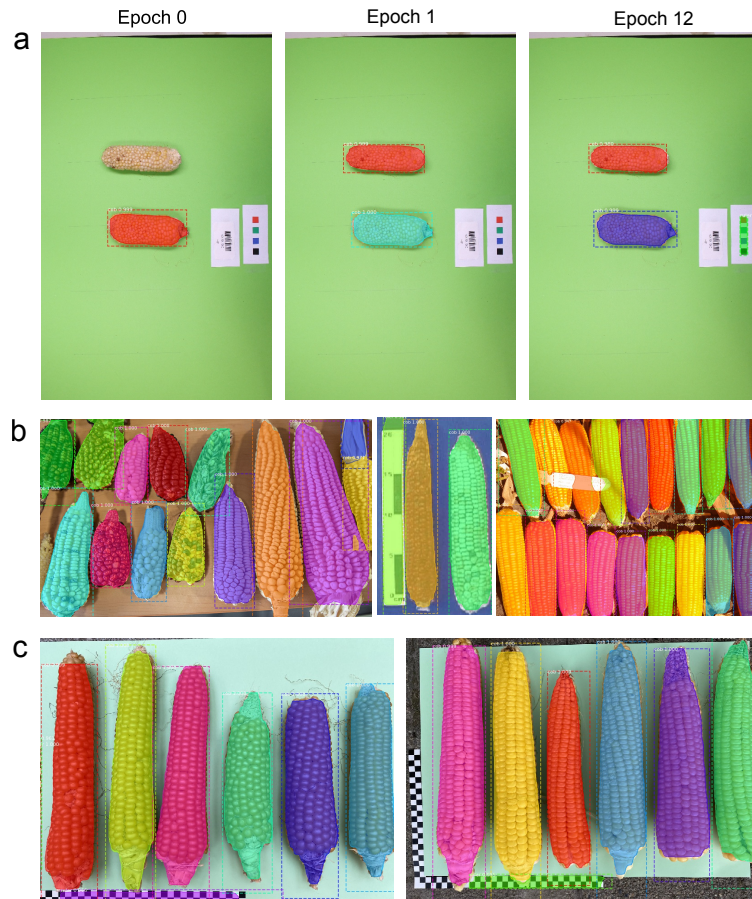

**Figure 6:** Detection of cob and ruler after model updating the pretrained maize model with different image datasets. a) Updating with 10 training images from *ImgCross*. The original maize model detected only one cob (epoch 0). After one epoch of model updating both cobs were accurately segmented and after epoch 12 the different ruler element was detected. Photo credit: K. Schmid, University of Hohenheim. b) Segmentation of various genebank images after updating for 25 epochs with 20 training images from *ImgDiv*. Photo credits: <https://nexusmedianews.com/drought-is-crippling-small-farmers-in-mexico-with-consequences-for-everyone-else-photos-73b35a01e4d> (Left) [https://www.ars.usda.gov/ARUserFiles/50301000/Races\\_of\\_Maize/RoM\\_Paraguay\\_0\\_Book.pdf](https://www.ars.usda.gov/ARUserFiles/50301000/Races_of_Maize/RoM_Paraguay_0_Book.pdf) (Center) Right: CIMMYT, <https://flic.kr/p/9h9X6B>. All photos are available under a Creative Commons License. c) Segmentation of cobs and rulers in post-harvest images of the Swiss Rheintaler Ribelmais landrace with the best model from *ImgCross* without updating on these images. Photo credit: Benedikt Kogler, Verein Rheintaler Ribelmais e.V., Switzerland

**Table 2:** Lsmeans of  $AP@[.5:.95]$  score of the significant interactions for model updating, dataset  $\times$  starting model and starting model  $\times$  training set size. Means sharing a common letter are not significantly different.

| Dataset        | Starting Model | Lsmeans            |
|----------------|----------------|--------------------|
| ImgDiv         | maize          | 75.40 <sup>a</sup> |
| ImgCross       | maize          | 71.04 <sup>b</sup> |
| ImgCross       | COCO           | 62.74 <sup>c</sup> |
| ImgDiv         | COCO           | 61.86 <sup>c</sup> |
| Starting Model | Dataset        | Lsmeans            |
| maize          | 40             | 74.11 <sup>a</sup> |
| maize          | 50             | 74.06 <sup>a</sup> |
| maize          | 30             | 73.48 <sup>a</sup> |
| maize          | 10             | 72.40 <sup>a</sup> |
| maize          | 20             | 72.03 <sup>a</sup> |
| COCO           | 50             | 67.54 <sup>b</sup> |
| COCO           | 40             | 65.39 <sup>b</sup> |
| COCO           | 20             | 61.71 <sup>c</sup> |
| COCO           | 30             | 61.67 <sup>c</sup> |
| COCO           | 10             | 55.19 <sup>d</sup> |

201 question whether image analysis identifies genebank accessions which are highly heterogeneous  
202 with respect to cob traits by using measures of trait variation and multivariate clustering algorithms.

203 Our goal was to identify heterogeneous genebank accessions that either harbor a high level of  
204 genetic variation or are admixed because of co-cultivation of different landraces on farmers fields  
205 or mix-ups during genebank storage. We therefore analysed variation of cob parameters within  
206 images to identify genebank accessions with a high phenotypic diversity of cobs using two different  
207 multivariate analysis methods to test the robustness of the classification.

208 The first approach consisted of calculating a  $Z$ -score of each cob in an image as measure of de-  
209 viation from the mean of the image (Within image  $Z$ -scores), clustering these scores with a PCA,  
210 followed by applying CLARA and determining the optimal number of clusters with the average sil-  
211 houette method. The second approach consisted of calculating a centered and scaled standard de-  
212 viation of cob parameters for each image, applying a PCA to the values of all images, clustering with  
213  $k$ -means and determining the optimal cluster number with the gap statistic. With both approaches,  
214 the best-fitting numbers of clusters was  $k = 2$  with a clear separation between clusters and little  
215 overlap along the first principal component (Figure 7). The distribution of trait values between the  
216 two groups shows that they differ mainly by the three RGB colors and cob length (in the  $Z$ -score  
217 analysis only) suggesting that cob color tends to more variable than most morphological traits within  
218 genebank accessions. Supplementary Figure S1 shows images of genebank accessions classified  
219 as homogeneous and variable, respectively.

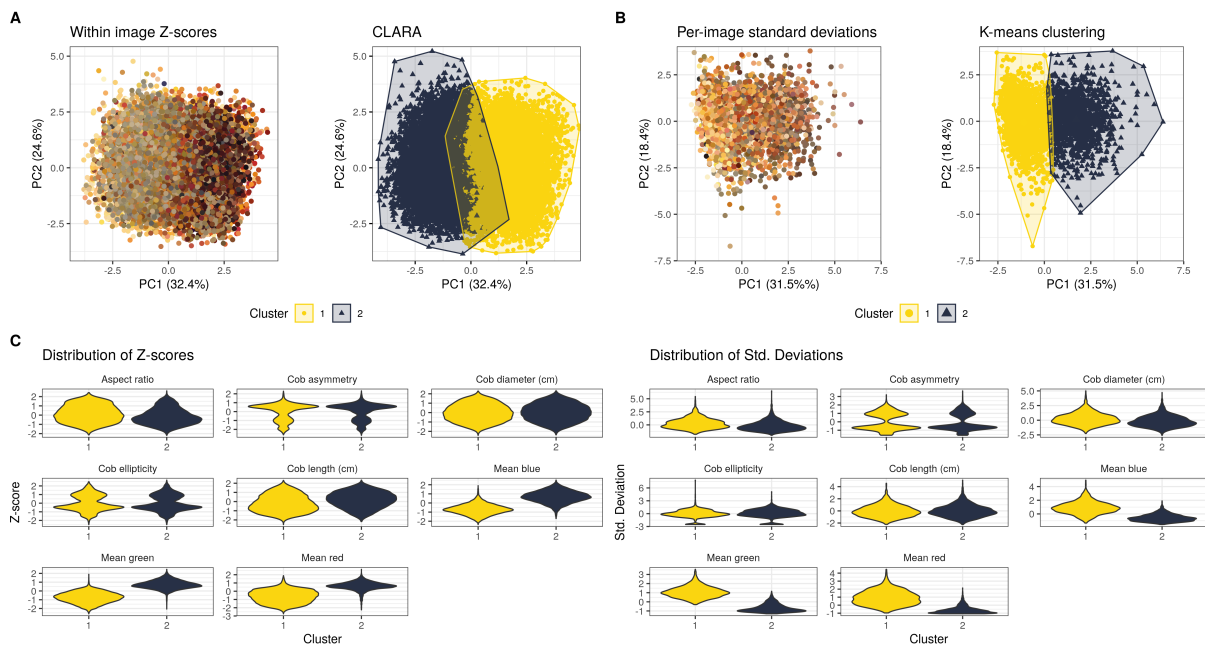

**Figure 7:** Clustering of individual images by their heterogeneity of maize cob traits within images. Clustering approaches with the extracted cob traits. (A) First two principal components showing the average color of individual cobs ( $n = 19,867$  cobs) (left) and average cob color per analyzed image ( $n = 3,302$  images) (right). The colors of each dot reflect the average RGB values (i.e., the color) of each cob, or image, respectively. (B) PCA plots showing clusters identified with CLARA (left) and  $k$ -means clustering (right). (C) Distribution of cob traits within each method and cluster.

## 220 Discussion

221 Our comparison of three image segmentation methods showed Mask R-CNN to be superior to  
222 the classic image analysis method Felzenszwalb-Huttenlocher segmentation and Window-CNN for  
223 maize cob detection and segmentation. Given the recent success of Mask R-CNN for image  
224 segmentation in medicine or robotics, its application for plant phenotyping is highly promising as  
225 demonstrated in strawberry fruit detection for harvesting robots [38], orange fruit detection [39] and  
226 pomegranate tree detection [40]. Here we present another application of Mask R-CNN for maize  
227 cob instance segmentation and quantitative phenotyping in the context of genebank phenomics. In  
228 contrast to previous studies we performed a statistical analysis on the relative contribution of Mask  
229 R-CNN training parameters, and our application is based on more diverse and larger training image  
230 sets of 200 and 1,000 images. Finally, we propose a simple and rapid model updating scheme  
231 for applying the method on different maize cob image sets to make this method widely useful for  
232 cob phenotyping. The provided manuals offer a simple application and update of the deep learning  
233 model on custom maize cob datasets.

234 **Identifying optimal parameters for image segmentation** After optimizing various model param-  
235 eters, the final Mask R-CNN model detected and segmented cobs and rulers very reliably with a  
236 very high  $AP@[.5 : .95]$  score of 87.7, enabling accurate and fast extraction of cob features. Since  
237 such scores have not been reported for existing pipelines for maize cob annotation because they are  
238 mainly used for deep learning, we compared them to other contexts of image analysis and plant phe-

notyping where these parameters are available. Our score is higher than the original Mask R-CNN implementation on COCO with Cityscapes images [41], possibly due to a much smaller number of classes (2 versus 80) in our dataset. Depending on the backend network, the score of the original implementation ranged between 26.6 and 37.1. The maize cob score is also greater than 57.5 in the test set for pomegranate tree detection [40] and comparable to a score of 89.85 for strawberry fruit detection [38]. Although both maize cob and ruler detection and segmentation performed well, we observed minor inaccuracies in some masks. A larger training set did not improve precision and eliminate these inaccuracies, as the resolution of the mask branch in the Mask R-CNN framework may be too low, which could be improved by adding a convolutional layer of, for example,  $56 \times 56$  pixel instead of the usual  $28 \times 28$  pixel at the cost of longer computing time.

Mask R-CNN achieved higher correlation coefficients between true and predicted cob measurements than existing image analysis methods, which reported coefficients of  $r = 0.99$  for cob length,  $r = 0.97$  for cob diameter [14] and  $r = 0.93$  for cob diameter [13]. Our Mask R-CNN achieved coefficients of  $r = 0.99$  for cob diameter and  $r = 1$  for cob length. Such correlations are a remarkable improvement considering that they were obtained with the highly diverse and inhomogeneous ImgOld and ImgNew image data (Table 8 and Supplementary Table S4), whereas previous studies used more homogeneous images with respect to color and shape of elite maize hybrid breeding material taken with uniform backgrounds. The high accuracy of Mask R-CNN indicate the advantage of the learning on specific cob and ruler patterns in deep learning.

Another feature of our automated pipeline is the simultaneous segmentation of cob and ruler, which allows pixel measurements to be instantly converted to centimeters and morphological measurements to be returned. Such an approach was also used by Makanza et al., [14], but no details on ruler measurements or accuracy of ruler detection were provided. The ability to detect rulers and cobs simultaneously is advantageous in a context where professional imaging equipment is not available, such as agricultural fields.

**Selection of training parameters to reduce annotation and training workload** Our Mask R-CNN workflow consists of annotating the data, training or updating the model, and running the pipeline to automatically extract features from the maize cobs. The most time-consuming and resource-intensive step was the manual annotation of cob images to provide labeled images for training, which took several minutes per image, but can be accelerated by supporting software [42]. In the model training step, model weights are automatically learned from the annotated images in an automated way, which is a major advantage over existing maize cob detection pipelines that require manual fine-tuning of parameters for different image datasets using operations such as thresholding, filtering, water-shedding, edge detection, corner detection, blurring and binarization [13, 14, 15].

Statistical analysis of each Mask R-CNN training parameters helps to reduce the amount of annotation and fine-tuning required (Tables 1 and 2). For example, there was no significant improvement on a large training set of 1,000 compared to 200 images, as learning on and segmenting of two object classes only seems to be a simple task for Mask R-CNN. Therefore, the significant amount of work involved in manual image annotation can be reduced if no more than 200 images need to be anno-

278 tated. Since many training parameters did not have a strong impact on the final model result, this  
279 suggests that such parameters do not need to be fine-tuned. For example, using all layers instead  
280 of only the network heads (only the last part of the network involving the fully-connected layers) did  
281 not improve significantly the final detection result. Training image datasets with only a few object  
282 classes on network heads greatly reduces the runtime for model training.

283 **Technical equipment and computational resources for deep learning** The robustness of the  
284 Mask R-CNN approach imposes only simple requirements for creating images for both training and  
285 application purposes. RGB images taken with a standard camera are sufficient. In contrast, neural  
286 network training requires significant computational resources and is best performed on a high per-  
287 formance computing cluster or on GPUs with significant amounts of RAM. Training of the 90 different  
288 models (Table S6) was executed over 3 days, using 4 parallel GPUs on a dedicated GPU cluster.  
289 However, once the maize model is trained, model updating with only a few annotated images from  
290 new maize image data does not require a high performance computing infrastructure anymore, as  
291 in our case updating with 20 images was achieved in less than an hour on a normal workstation with  
292 16 CPU threads and 64GB RAM.

293 Model updating with the pre-trained maize model on two different image datasets *ImgCross* and  
294 *ImgDiv* significantly improved the  $AP@[.5 : .95]$  score for cob and ruler segmentation on the new  
295 images. The improvement was achieved despite additional features in the new image data that were  
296 absent from the training data. New features include rotated images, cobs in different orientation  
297 (horizontal instead of vertical) and different backgrounds (Figure 6). The advantage of a pre-trained  
298 maize model over the standard COCO model was independent of the image data set and achieved  
299 higher  $AP@[.5 : .95]$  scores with a small number of epochs (Figure 5) because it saves training  
300 time for new image types, is widely applicable, and can be easily transferred to new applications for  
301 maize cob phenotyping. Importantly, the initial training set is not required for model updating. Our  
302 analyses indicate that only 10-20 annotated new images are required and the update can be limited  
303 to 50 epochs. The updated model can then be tested on the new image dataset, either by visual  
304 inspection of the detection or by annotating some validation images to obtain a rough estimate of the  
305  $AP@[.5 : .95]$  score. The phenotypic traits can then be extracted by the included post-processing  
306 workflow, which itself only needs to be modified if additional parameters are to be implemented.

307 The runtime of the pipeline after model training is very fast. Image segmentation with the trained  
308 Mask R-CNN model and parameter estimation of eight cob traits took on average of 3.6 seconds per  
309 image containing an average of six cobs. This time is shorter than previously published pipelines  
310 (e.g., 13 seconds per image in [13]), although it should be noted that any such comparisons are not  
311 based on the same hardware and the same set of traits. For example, the pipeline for three dimen-  
312 sional cob phenotyping performs a flat projection of the surface of the entire cob, but is additionally  
313 capable of annotating individual cob kernels and the total time for analyzing a single cob is 5-10  
314 minutes [15]. The ear digital imaging (EDI) pipeline of Makanza et al. [14] processes more than 30  
315 unthreshed ears at the same time and requires more time per image at 10 seconds, but also extracts  
316 more traits. However, this pipeline was developed on uniform and standardized images and does  
317 not involve a deep learning approach to make it generally applicable.

318 **Application of the Mask R-CNN pipeline for genebank phenomics** To demonstrate the utility  
319 of our pipeline, we applied it to original images of maize cobs from farmer's fields during the estab-  
320 lishment of the official maize genebank in Peru in the 1960s and 1970s (ImgOld) and to more recent  
321 photographs taken during the regeneration of existing maize material in 2015 (ImgNew). The native  
322 maize diversity of Peru was divided into individual landraces based mainly on cob traits. Our interest  
323 was to identify genebank accessions with high or low diversity of cob traits within accessions to clas-  
324 sify accessions as 'pure' representatives of a landrace or as accessions with high levels of native  
325 genetic diversity, evidence of recent gene flow, or random admixture of different landraces. We used  
326 two different approaches to characterize the amount of variation for each trait within the accessions  
327 based on the eight traits measured by our pipeline. Unsupervised clustering of variance measure  
328 identified two groups of accessions that differed in their overall level of variation. The distribution  
329 of normalized variance parameters (Z-scores and standard deviations) within both groups indicate  
330 that variation in cob color has the strongest effect on variation within genebank accessions, sug-  
331 gesting that cob color is more variable than morphometric characters like cob length or cob diameter.  
332 This information is useful for subsequent studies, in terms of the relationship between genetic and  
333 phenotypic variation in native maize diversity, the geographic patterns of phenotypic variation within  
334 landraces, or the effect of seed regeneration during *ex situ* conservation on phenotypic diversity,  
335 which we are currently investigating in a separate study.

## 336 Conclusion

337 We present the successful application of deep learning by Mask R-CNN to maize cob segmentation  
338 in the context of genebank phenomics by developing a pipeline written in Python for a large-scale  
339 image analysis of highly diverse maize cobs. We also developed a post-processing workflow to au-  
340 tomatically extract measurements of eight phenotypic cob traits from cob and ruler masks obtained  
341 with Mask R-CNN. In this way, cob parameters were extracted from 19,867 individual cobs with a fast  
342 automated pipeline suitable for high-throughput phenotyping. Although the Mask R-CNN model was  
343 developed based on native maize diversity of Peru, the model can be easily used and updated for  
344 additional image types in contexts like the genetic mapping of cob traits or in breeding programs. It  
345 therefore is of general applicability in maize breeding and research and for this purpose, we provide  
346 simple manuals for maize cob detection, parameter extraction and deep learning model updating.  
347 Future developments of the pipeline may include linking it to mobile phenotyping devices for real-  
348 time measurements in the field and using the large number of segmented images to develop refined  
349 models for deep learning, for example, to estimate additional parameters such as row numbers or  
350 characteristics of individual cob kernels.

## 351 Materials and Methods

352 **Plant material** The plant material used in this study is based on 2,484 genebank accessions of 24  
353 Peruvian maize landraces collected from farmer's fields in the 1960s and 1970s, which are stored

354 the Peruvian maize genebank hosted at the Universidad Agraria La Molina (UNALM), Peru. These  
355 accessions originate from the three different ecogeographical environments (coast, highland and  
356 rainforest) present in Peru and therefore represent a broad sample of Peruvian maize diversity.

357 **Image data of maize cobs** All accessions were photographed during their genebank registration.  
358 An image was taken with a set of 1-12 maize cobs per accession laid out side by side with a ruler  
359 and accession information. Because the accessions were collected over several years, the images  
360 were not taken under the same standardized conditions of background, rulers and image quality.  
361 Prints of these photographs were stored in light-protected cupboards of the genebank and were  
362 digitized with a flatbed scanner in 2015 and stored as PNG files without further image processing.  
363 In addition, all genebank accession were regenerated in 2015 at three different locations reflecting  
364 their ecogeographic origin and the cobs were photographed again with modern digital equipment  
365 under standardized conditions and also stored as PNG images. The image data consist thus consist  
366 of 1,830 original (ImgOld) and 1,619 new (ImgNew) images for a total of 3,449 images. Overall, the  
367 images show a high level of variation due to technical and genetic reasons, which are outlined in  
368 Figure 8. These datasets were used for training and evaluation of the image segmentation methods.

369 Passport information available for each accession and their assignment to the different landraces is  
370 provided in Table S5. All images were re-scaled to a size of 1000x666 pixels with OpenCV, version  
371 3.4.2; [43].

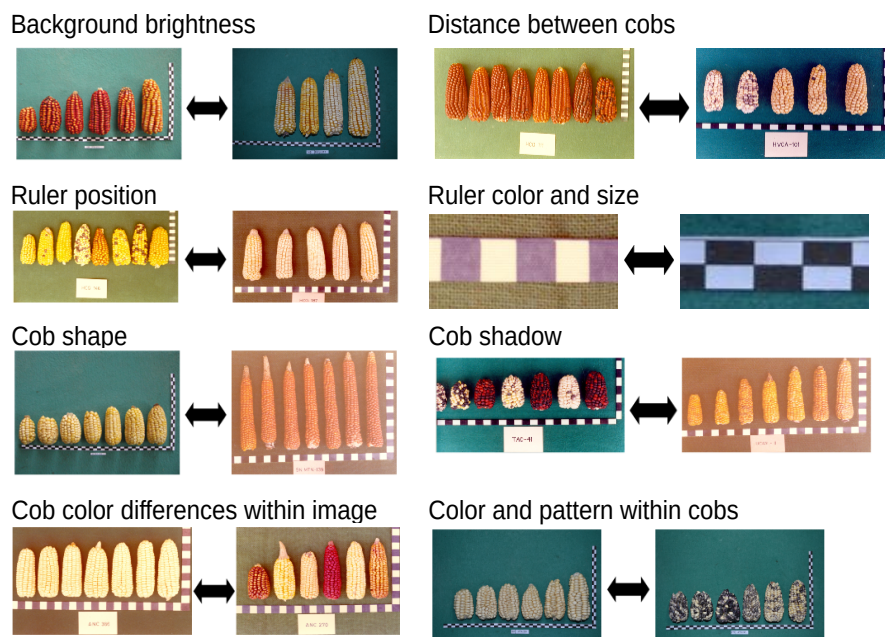

**Figure 8:** Variability of image properties among the complete dataset (containing ImgOld and ImgNew)

372 We used two different datasets for updating the image segmentation models and evaluating their  
373 robustness. The ImgCross image dataset contains images of maize cobs and spindles derived from  
374 a cross of Peruvian landraces with a synthetic population generated from European elite breeding  
375 material and therefore reflects genetic segregation in the F2 generation. The images were taken  
376 with digital camera at the University of Hohenheim under standardized conditions and differ from the



377 other data sets by a uniform green background, a higher resolution 3888x2592 pixels (no re-sizing),  
378 a variable orientation of the cobs, orange labels and differently colored squares instead of a ruler.

379 A fourth set of images (ImgDiv) was obtained mainly from publicly available South American maize  
380 genebank catalogs and from special collections available as downloadable figures on the internet.  
381 The ImgDiv data vary widely in terms of number and color of maize cobs, image dimensions and  
382 resolution, number, position and orientation of cobs. Some images also contain rulers as in ImgOld  
383 and ImgNew.

384 **Software and methods for image analysis** Image analysis was mainly performed on a worksta-  
385 tion running Ubuntu 18.04 LTS and the analysis code was written in Python (version 3.7; [44]) for  
386 all image operations. OpenCV (version 3.4.2; [43]) was used to perform basic image operations like  
387 resizing and contour finding.

388 For Window-CNN and Mask R-CNN, deep learning was performed with the Tensorflow (version  
389 1.5.0; [45]) and Keras (version 2.2.4; [46]) libraries. In Mask R-CNN, the framework [47] from the  
390 matterport implementation ([https://github.com/matterport/](https://github.com/matterport/Mask_RCNN) Mask\_RCNN) was used and adapted to  
391 the requirements of the maize cob image datasets. Statistical analyses for evaluating the contri-  
392 bution of different parameters in Mask R-CNN and for the clustering of the obtained cob traits was  
393 carried out with R version 3.6.3 [48].

394 We tested three different approaches (Felzenszwalb-Huttenlocher segmentation, Window-CNN and  
395 Mask R-CNN) for cob and ruler detection and image segmentation. Details on their implementation  
396 and comparison can be found in the Supplementary Text, but our approach is briefly described  
397 below.

398 For image analysis using traditional approaches, we first applied various tools such as filtering,  
399 water-shedding, edge detection and corner detection to representative subsets of ImgOld and ImgNew.  
400 The best segmentation results were obtained with the graph-based Felzenszwalb-Huttenlocher im-  
401 age segmentation algorithm [49] implemented in the Python scikit-image library version 0.16.2 [50]  
402 and the best ruler detection with the naive Bayes Classifier, implemented in the PlantCV library [51].  
403 The parameters had to be manually fine-tuned for each of the two image datasets.

404 To evaluate deep learning, we used a windows-based (Window-CNN) and a Mask R convolutional  
405 neural network (Mask R-CNN), both of which require training on annotated and labeled image data.  
406 Convolutional Neural Networks [52] (CNN) are known to be the most powerful feature extractors and  
407 their popularity for image classification dates back to the ImageNet classification challenge, which  
408 was won by the architecture AlexNet [53]. Generally, a CNN consists of 3 different layer types,  
409 which are subsequently connected: Convolutional layers, Pooling Layers and Fully-Connected (FC)  
410 Layers. In a CNN for cob detection classes 'cob' and 'ruler' can be learned as a feature using  
411 deep learning, which provides maize cob feature extraction independent of the challenges in diverse  
412 images like scale, cob color, cob shape, background color and contrast.

413 Since our goal was to localize and segment the cobs within the image, we first used sliding window  
414 CNN (Window-CNN), which passes parts of an image to a CNN at a time and returns the probability

415 that it contains a particular object class. Sliding windows have been used in plant phenotyping  
416 to detect plant segments [54, 55]. Our implementation of Window-CNN is described in detail in  
417 Supplementary Text.

418 Since sliding window CNN have low accuracy and very long runtime, feature maps are used to  
419 filter out putative regions of interest on which boxes are refined around objects. Mask R-CNN [47]  
420 is the most recent addition to the family of R-CNN [56] and includes a Region Proposal Network  
421 (RPN) to reduce the number of bounding boxes by passing only  $N$  region proposals that are likely  
422 to contain some object to a detection network block. The detection network generates the final  
423 object localizations along with the appropriate classes from the RPN proposals and the appropriate  
424 features from the feature CNN. Mask R-CNN extends a Fast R-CNN [57] with a mask branch of two  
425 additional convolutional layers that perform additional instance segmentation and return a pixel-wise  
426 mask for each detected object containing a bounding box, a segmentation mask and a class label.

427 **Implementation of Mask R-CNN to detect maize cobs and rulers** The training image data (200  
428 or 1,000 images) were randomly selected from the two datasets `ImgOld` and `ImgNew` to achieve  
429 maximum diversity in terms of image properties (Table 8 and Supplementary Table S4). Both subsets  
430 were each randomly divided into a training set (75%) and a validation set (25%). Both image subsets  
431 were annotated using VGG Image Annotator (via; version 2.0.8 [58]). A pixel-precise mask was  
432 drawn by hand around each maize cob (Supplementary Figure S2). The ruler was labeled with  
433 two masks, one for the horizontal part and one for the vertical part, which facilitates later prediction  
434 of the bounding boxes of the ruler compared to annotating the entire ruler element as one mask.  
435 Each mask was labeled as "cob" or "ruler", and the annotations for training and validation sets were  
436 exported separately as JSON files.

437 The third step consisted of model training on multiple GPUs using a standard tensorflow implemen-  
438 tation of Mask R-CNN for maize cob and ruler detection. We used the pre-trained weights of the  
439 COCO model, which is the standard model [47] derived from training on the MS COCO dataset [37],  
440 in the layout of resnet 101 (transfer learning). The original Mask R-CNN implementation was modi-  
441 fied by adding two classes for cob and ruler in addition to the background class. Instead of saving  
442 all models after each training epoch, only the best model with the least validation loss was saved  
443 to save memory. For training the Mask R-CNN models, we used Tesla K80 GPUs with 12 GB RAM  
444 each on the BinAC GPU cluster at the University of Tübingen.

445 We trained 90 different models with different parameter settings (Supplementary Table S6) on both  
446 image datasets. The learning rate parameter *learningrate* was set to vary from  $10^{-3}$ , as in the  
447 standard implementation, to  $10^{-5}$ , since models with smaller datasets often suffer from overfitting,  
448 which may require smaller steps in learning the model parameters. Training was performed over 15,  
449 50, or 200 epochs (*epochsoverall*) to capture potential overfitting issues. The parameter *epochs.m*  
450 distinguishes between training only the heads, or training the heads first, followed by training on the  
451 complete layers of resnet101. The latter requires more computation time, but offers the possibility  
452 to fine tune not only the heads, but all the layers to obtain a more accurate detection. Also, the  
453 mask loss weight (*masklossweight*) was given the value of 1, as in the default implementation, or

454 10, which means a higher focus on reducing mask loss. Also, the monitor metric (*monitor*) for the  
455 best model checkpoint was set to vary between the default validation loss and the mask validation  
456 loss. The latter option was tested to optimize preferentially for mask creation, which is usually  
457 more challenging than determining object class, bounding box loss, etc. The use of the minimask  
458 (*minimask*) affects the accuracy of mask creation and in the default implementation consists of a  
459 resizing step before the masks are forwarded by the CNN during the training process.

460 The performance of these models for cob and ruler detection was evaluated by the IoU (Intersection  
461 over Union) score or Jaccard index [59], which is the most popular metric to evaluate the perfor-  
462 mance of object detectors. The IoU score between a predicted and a true bounding box is calculated  
463 by

$$IoU = \frac{\text{Area of Overlap}}{\text{Area of Union}} \quad (1)$$

464 The most common threshold for IoU is 50% or 0.5. With IoU values above 0.5, the predicted object  
465 is considered as true positive (TP), else as a false positive (FP). Precision is calculated by

$$P = \frac{TP}{TP + FP} \quad (2)$$

466 The average precision (AP) was calculated by averaging  $P$  over all ground-truth objects of all classes  
467 in comparison to their predicted boxes, as demonstrated in various challenges and improved network  
468 architectures [60, 61, 62].

469 Following the primary challenge metric of the COCO dataset [63], the goodness of our trained mod-  
470 els was also scored by  $AP@[.5 : .95]$ , sometimes also just called AP, which is the average AP over  
471 different IoU thresholds from 50% to 95% in 5% steps. In contrast to usual object detection mod-  
472 els where IoU/AP metrics are calculated for boxes, in the following IoU relates to the masks [41],  
473 because this explores the performance of instance segmentation. We performed an ANOVA with  
474 90 model results scores to evaluate the individual impact of the parameters on the  $AP@[.5 : .95]$   
475 score. Logit transformation was applied to fit the assumptions of heterogeneity of variance and nor-  
476 mal distribution (Supplementary Figure S3). Model selection was carried out including parameters  
477 *learningrate* ( $10^{-3}$ ,  $10^{-4}$ ,  $10^{-5}$ , *epochs.m* (1:only heads, 2:20 epochs heads, 3:10 epochs heads;  
478 for the rest all model layers trained), *epochsoverall* (15, 50, 200), *masklossweight* (1,10), *monitor*  
479 (val loss, mask val loss) and *minimask* (yes, no). Also all two-way interactions were included in the  
480 model, dropping non-significant interactions first and then non-significant main effects if none of their  
481 interactions were significant.

482 These results allow to formulate the following final model to describe contributions of the parameters  
483 on Mask R-CNN performance:

$$y_{ijh} = \mu + b_i + v_j + k_h + (bk)_{ih} + e_{ijh} \quad (3)$$

484 where  $\mu$  is the general effect,  $b_i$  the effect of the  $i$ -th minimask,  $v_j$  the effect of the  $j$ -th overall number  
485 of epochs,  $k_h$  the effect of the  $h$ -th training set size,  $(bk)_{ih}$  the interaction effect between the number  
486 of epochs and the training set size and  $e_{ijh}$  the random deviation associated with  $y_{ijh}$ . We calculated  
487 ANOVA tables, back-transformed lsmeans and contrasts (confidence level of 0.95) for the significant

488 influencing variables. As last step of model training, we set up a workflow with the best model as  
489 judged by its  $AP@[.5 : .95]$  score and performed random checks whether objects were detected  
490 correctly.

491 **Workflow for model updating with new pictures** To investigate the updating ability of Mask R-  
492 CNN on different maize cob image datasets, we annotated additionally 150 images (50 training,  
493 100 validation images) from each of the *ImgCross* and *ImgDiv* datasets. For *ImgCross*, the high  
494 resolution of  $3888 \times 2592$  pixels was maintained, but 75% of the images were rotated (25% by  $90^\circ$ ,  
495 25% by  $180^\circ$ , and 25% by  $270^\circ$ ) to increase diversity. The corn cob spindles on these images were  
496 also labeled as cobs and the colored squares were labeled as rulers. The *ImgDiv* images were left  
497 at their original resolution and annotated with the cob and ruler classes.

498 The model weights of the best model (M104) obtained by training with *ImgOld* and *ImgNew* were  
499 used as initial weights and updated with *ImgCross* and *ImgDiv* images. Based on the statistical  
500 analysis, optimal parameter levels of the main parameters were used and only the network heads  
501 were trained with a learning rate of  $10^{-4}$  for 50 epochs without the minimum mask. Training was  
502 performed with different randomly selected sets (10, 20, 30, 40, and 50 images) to evaluate the  
503 influence of the number of images on the quality of model updating. For each training run, all  
504 models with an improvement step in validation loss were saved, and the  $AP@[.5:.95]$  score was  
505 calculated for each of them. For comparison, all combinations of models were also trained with the  
506 standard COCO weights.

**Statistical analysis of model updating results** To evaluate the influence of the data set, the starting model, and the size of the training set, an ANOVA was performed on the data set of  $AP@[.5 : .95]$  from all epochs and combinations. Logit transformation was applied to meet the assumptions of heterogeneity of variance and normal distribution. Epoch was included as a covariate. Forward model selection was performed using the parameters *dataset* (*ImgCross*, *ImgDiv*), *starting model* (COCO, pre-trained maize model), and *training set size* (10, 20, 30, 40, 50). All two-way and three-way parameter interactions were included in the model. Because the three-way interaction was not significant, the significant two-way interactions and significant main effects were retained in the final

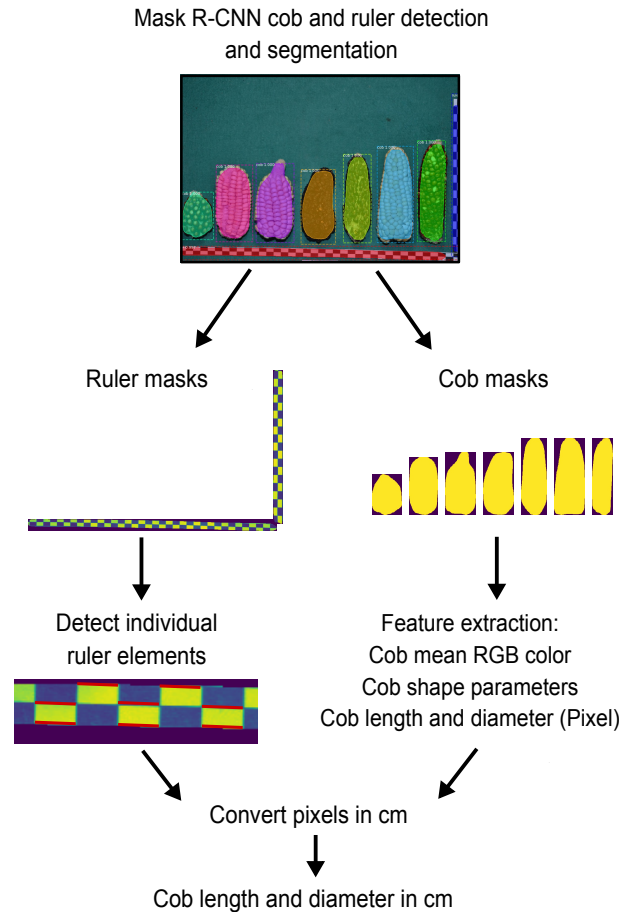

**Figure 9:** Post-processing of segmented images using a Mask R-CNN workflow that analyses segments labeled as 'cob' and 'ruler' to extract the parameters cob length, diameter, mean RGB color, and shape parameters ellipticity and asymmetry. Cob length and diameter measures in pixels are converted to cm values by measuring the contours of single ruler elements.

model, which can be denoted as follows:

$$y_{ijh} = \mu + c_i + n_j + r_h + (bk)_{ih} + e_{ijh}$$

where

$\mu$  = general effect

$c_i$  = effect of the  $i$ -th dataset

$n_j$  = effect of the  $j$ -th starting model

$r_h$  = effect of the  $h$ -th training set size

$(cn)_{ih}$  = interaction effect between the dataset and the starting model

$(nk)_{jh}$  = interaction effect between the starting model and the training set size

$e_{ijh}$  = random deviation associated with  $y_{ijh}$

507 ANOVA tables, back-transformed lsmeans (Supplementary Tables S7 and S8) and contrasts (confi-  
508 dence level of 0.95) for the significant influencing variables were calculated.

509 **Post-processing of segmented images for automated measurements and phenotypic trait**  
510 **extraction** Mask R-CNN images are post-processed with an automated pipeline to extract phe-  
511 notypic traits of interest such as cob shape or cob color descriptors (Figure 9). The Mask R-CNN  
512 model returns a list of labeled masks, which are separated into cob and ruler masks for subsequent  
513 analysis. Contour detection is applied to binarized ruler masks to identify individual black or white  
514 ruler elements, whose length in pixel is then average for elements of a ruler to obtain a pixel value  
515 per cm for each image. Length and diameter of cob masks are then converted from pixel into cm  
516 values using the average ruler lengths. The cob masks are also used to calculate the mean RGB  
517 color of each cob. In contrast to a similar approach by Miller et al. [13], who sampled pixels from the  
518 middle third of cobs for RGB color extraction, we used the complete cob mask because kernel color  
519 was variable throughout the cob in highly diverse image data. We also used the complete cob mask  
520 to extract cob shape parameters that include asymmetry and ellipticity similar to a previous study of  
521 avian eggs [64], who characterized egg shape diversity using the morphometric equations of Baker  
522 [65]. Since our image data contained a high diversity of maize cob shapes we reasoned that shape  
523 parameters like asymmetry and ellipticity are useful for a morphometric description of maize cob  
524 diversity. Overall the following phenotypic traits were extracted from almost 19,867 cobs: Diameter,  
525 length, aspect ratio (length/diameter), asymmetry, ellipticity and mean RGB color separated by red,  
526 green, blue channels. Our pipeline returned all cob masks for later analysis of additional parameters  
527 as .jpg images.

528 **Quantitative comparison between Felzenszwalb-Huttenlocher segmentation, Window-CNN**  
529 **and Mask R-CNN** For quantitative comparisons between the three image segmentation meth-  
530 ods, a subset of 50 images from ImgOld and 50 images from ImgNew were randomly selected.  
531 None of the images were included in the training data from Window-CNN or Mask R-CNN, and  
532 the subset is unbiased against the training data. True measurements of cob length and diameter  
533 were obtained using the annotation tool *via* [58]. Individual cob dimensions per image could not be  
534 directly compared to predicted cob dimensions because Felzenszwalb-Huttenlocher segmentation  
535 and Window-CNN often contained multiple cobs in a box or certain cobs were contained in multiple  
536 boxes. Therefore, the mean of the predicted cob width and length per image was calculated for each  
537 approach, penalizing incorrectly predicted boxes. Pearson correlation was calculated between the  
538 true and predicted mean diameter and length of the cob per image separately for the ImgOld and  
539 ImgNew sets.

540 **Unsupervised clustering to detect images with high cob diversity** To identify genebank acces-  
541 sions with high phenotypic diversity in ImgOld and ImgNew images, we used two different unsuper-  
542 vised clustering methods. In the first approach, individual cob features (width, length, asymmetry,  
543 ellipticity, and mean RGB values) were scaled after their extraction from the images. The Z-score of  
544 each cob was calculated as  $Z_{ij} = \frac{x_{ij} - \bar{X}_j}{S_j}$ , where  $Z_{ij}$  is the Z-score of the  $i$ th cob in the  $j$ th image,  $x_{ij}$  is  
545 a measurement of the  $i$ th cam of the  $j$ th image, and  $\bar{X}_j$  and  $S_j$  are the mean and are the standard  
546 deviation of the  $j$ -th image, respectively. The scaled dataset was analyzed using CLARA (Clustering  
547 LARge Applications) as described in the *cluster* R package [66]. The optimal cluster number was

548 determined by the average silhouette method implemented in the R package factoextra [67].

549 In the second approach, we used the standard deviations of individual measurements within each  
550 each image ( $S_j$ ) as input for clustering. The standard deviations of each image were centered and  
551 standardized so that the values obtained for all images were on the same scale. This dataset was  
552 then clustered with  $k$ -means and the number of clusters,  $k$ , was determined using the gap statistic  
553 [68], which compares the sum of squares within clusters to the expectation under a zero reference  
554 distribution.

## 555 Abbreviations

556  $AP@[.5 : .95] : AP@[IoU=0.50:0.95]$  , sometimes also called mAP.

557 CLARA: Clustering Large Applications

558 RPN: Region Proposal Network

## 559 Supplementary Information

560 • Supplementary Tables and Figures

561 • Supplementary Text

## 562 Declarations

563 **Acknowledgments** We are grateful to Gilberto Garcia for scanning and photographing the maize  
564 genebank accessions at UNALM, Emilia Koch for annotating the images, and Hans-Peter Piepho for  
565 statistical advice.

566 **Author contributions** LK and KS designed the study. LK performed the image analysis, imple-  
567 mented Felzenszwalb-Huttenlocher segmentation, Window-CNN and Mask R-CNN on the datasets,  
568 developed the model updating and carried out the statistical analyses. MCA conducted the multivari-  
569 ate analysis of phenotypic cob data. RB coordinated and designed the acquisition of the maize pho-  
570 tographs. LK and KS wrote the manuscript. All authors read, revised and agreed on the manuscript.

571 **Funding** This work was funded by the the Gips Schüle Foundation Award to K.S. and by KWS  
572 SEED SE Capacity Development Projekt Peru grant to R.B. and K.S. We acknowledge support  
573 by the High Performance and Cloud Computing Group at the Zentrum für Datenverarbeitung of the  
574 University of Tübingen, the state of Baden-Württemberg through bwHPC and the German Research  
575 Foundation (DFG) through grant no INST 37/935-1 FUGG.

576 **Availability of data and materials**

- 577 • Image files and annotations: <http://doi.org/10.5281/zenodo.4587304>
- 578 • Deep learning model and manuals with codes for custom detections and model updating:
- 579 <https://gitlab.com/kjschmidlab/deepcob>

580 **Ethics approval and consent to participate** Not applicable.

581 **Consent for publication** Not applicable.

582 **Competing interests** The authors declare that they have no competing interests.

583 **References**

- 584 [1] Araus JL, Cairns JE. Field high-throughput phenotyping: the new crop breeding frontier. *Trends in Plant*
- 585 *Science*. 2014;19(1):52–61.
- 586 [2] Wallace JG, Rodgers-Melnick E, Buckler ES. On the Road to Breeding 4.0: Unraveling the Good, the
- 587 *Bad, and the Boring of Crop Quantitative Genomics*. *Annual Review of Genetics*. 2018 Nov;52(1):421–
- 588 444.
- 589 [3] Furbank RT, Tester M. Phenomics—technologies to relieve the phenotyping bottleneck. *Trends in Plant*
- 590 *Science*. 2011;16(12):635–644.
- 591 [4] Großkinsky DK, Svensgaard J, Christensen S, Roitsch T. Plant phenomics and the need for physiological
- 592 *phenotyping across scales to narrow the genotype-to-phenotype knowledge gap*. *Journal of Experimen-*
- 593 *tal Botany*. 2015;66(18):5429–5440.
- 594 [5] Houle D, Govindaraju DR, Omholt S. Phenomics: the next challenge. *Nature Reviews Genetics*.
- 595 2010;11(12):855–866.
- 596 [6] Mir RR, Reynolds M, Pinto F, Khan MA, Bhat MA. High-throughput phenotyping for crop improvement in
- 597 *the genomics era*. *Plant Science*. 2019;282:60–72.
- 598 [7] Tardieu F, Cabrera-Bosquet L, Pridmore T, Bennett M. Plant phenomics, from sensors to knowledge.
- 599 *Current Biology*. 2017;27(15):R770–R783.
- 600 [8] Jin X, Zarco-Tejada P, Schmidhalter U, Reynolds MP, Hawkesford MJ, Varshney RK, et al. High-
- 601 *throughput estimation of crop traits: A review of ground and aerial phenotyping platforms*. *IEEE Geo-*
- 602 *science and Remote Sensing Magazine*. 2020;p. 0–0.
- 603 [9] Jiang Y, Li C, Xu R, Sun S, Robertson JS, Paterson AH. DeepFlower: a deep learning-based approach
- 604 *to characterize flowering patterns of cotton plants in the field*. *Plant Methods*. 2020 Dec;16(1):156.
- 605 [10] Granier C, Vile D. Phenotyping and beyond: modelling the relationships between traits. *Current Opinion*
- 606 *in Plant Biology*. 2014;18:96–102.
- 607 [11] Czedik-Eysenberg A, Seitner S, Güldener U, Koemeda S, Jez J, Colombini M, et al. The ‘PhenoBox’, a
- 608 *flexible, automated, open-source plant phenotyping solution*. *New Phytologist*. 2018;219(2):808–823.



- 609 [12] Xu H, Bassel GW. Linking Genes to Shape in Plants Using Morphometrics. *Annual Review of Genetics*.  
610 2020 Nov;54(1):417–437. Publisher: Annual Reviews.
- 611 [13] Miller ND, Haase NJ, Lee J, Kaeppeler SM, de Leon N, Spalding EP. A robust, high-throughput method  
612 for computing maize ear, cob, and kernel attributes automatically from images. *The Plant Journal*.  
613 2017;89(1):169–178.
- 614 [14] Makanza R, Zaman-Allah M, Cairns J, Eyre J, Burgueño J, Pacheco Á, et al. High-throughput method  
615 for ear phenotyping and kernel weight estimation in maize using ear digital imaging. *Plant Methods*.  
616 2018;14(1):49.
- 617 [15] Warman C, Fowler JE. Custom built scanner and simple image processing pipeline enables low-cost,  
618 high-throughput phenotyping of maize ears. *bioRxiv*. 2019;p. 780650.
- 619 [16] LeCun Y, Bengio Y, Hinton G. Deep learning. *nature*. 2015;521(7553):436–444.
- 620 [17] O'Mahony N, Campbell S, Carvalho A, Harapanahalli S, Hernandez GV, Krpalkova L, et al. Deep learning  
621 vs. traditional computer vision. In: *Science and Information Conference*. Springer; 2019. p. 128–144.
- 622 [18] Voulodimos A, Doulamis N, Doulamis A, Protopapadakis E. Deep learning for computer vision: A brief  
623 review. *Computational Intelligence and Neuroscience*. 2018;Article ID: 7068349.
- 624 [19] Fuentes A, Yoon S, Kim S, Park D. A robust deep-learning-based detector for real-time tomato plant  
625 diseases and pests recognition. *Sensors*. 2017;17(9):2022.
- 626 [20] Ubbens J, Cieslak M, Prusinkiewicz P, Stavness I. The use of plant models in deep learning: an appli-  
627 cation to leaf counting in rosette plants. *Plant Methods*. 2018;14(1):6.
- 628 [21] Messmer R, Fracheboud Y, Bänziger M, Vargas M, Stamp P, Ribaut JM. Drought stress and tropical  
629 maize: QTL-by-environment interactions and stability of QTLs across environments for yield components  
630 and secondary traits. *Theoretical and Applied Genetics*. 2009 Sep;119(5):913–930.
- 631 [22] Peng B, Li Y, Wang Y, Liu C, Liu Z, Tan W, et al. QTL analysis for yield components and kernel-related  
632 traits in maize across multi-environments. *Theoretical and Applied Genetics*. 2011 May;122(7):1305–  
633 1320.
- 634 [23] Mascher M, Schreiber M, Scholz U, Graner A, Reif JC, Stein N. Genebank genomics bridges the gap  
635 between the conservation of crop diversity and plant breeding. *Nature Genetics*. 2019 Jul;51(7):1076–  
636 1081.
- 637 [24] Nguyen GN, Norton SL. Genebank Phenomics: A Strategic Approach to Enhance Value and Utilization  
638 of Crop Germplasm. *Plants*. 2020 Jul;9(7):817. Number: 7 Publisher: Multidisciplinary Digital Publishing  
639 Institute.
- 640 [25] Matsuoka Y, Vigouroux Y, Goodman MM, Sanchez G J, Buckler E, Doebley J. A single domestication for  
641 maize shown by multilocus microsatellite genotyping. *Proceedings of the National Academy of Sciences*.  
642 2002 Apr;99(9):6080 LP – 6084.
- 643 [26] van Heerwaarden J, Hufford MB, Ross-Ibarra J. Historical genomics of North American maize. *Proceed-  
644 ings of the National Academy of Sciences*. 2012 Jul;p. 201209275.
- 645 [27] Kistler L, Maezumi SY, de Souza JG, Przelomska NA, Costa FM, Smith O, et al. Multiproxy evidence  
646 highlights a complex evolutionary legacy of maize in South America. *Science*. 2018;362(6420):1309–  
647 1313.
- 648 [28] Wilkes G. Corn, strange and marvelous: But is a definitive origin known. In: Smith C, Betran J, Runge  
649 E, editors. *Corn: Origin, History, Technology, and Production*. John Wiley & Sons; 2004. p. 3–63.
- 650 [29] Campos H, Caligari PD. *Genetic Improvement of Tropical Crops*. Springer; 2017.

- 651 [30] Romero Navarro JA, Willcox M, Burgueño J, Romay C, Swarts K, Trachsel S, et al. A study of allelic  
652 diversity underlying flowering-time adaptation in maize landraces. *Nature Genetics*. 2017 Mar;49(3):476–  
653 480.
- 654 [31] Ortiz R, Crossa J, Franco J, Sevilla R, Burgueño J. Classification of Peruvian highland maize races using  
655 plant traits. *Genetic Resources and Crop Evolution*. 2008;55(1):151–162.
- 656 [32] Grobman A. Races of maize in Peru: Their origins, evolution and classification. vol. 915. National  
657 Academies; 1961.
- 658 [33] Ortiz R, Taba S, Tovar VHC, Mezzalama M, Xu Y, Yan J, et al. Conserving and enhancing maize genetic  
659 resources as global public goods—a perspective from CIMMYT. *Crop Science*. 2010;50(1):13–28.
- 660 [34] Ortiz R, Sevilla R. Quantitative descriptors for classification and characterization of highland Peruvian  
661 maize. *Plant Genetic Resources Newsletter*. 1997;110:49–52.
- 662 [35] Abu Alrob I, Christiansen J, Madsen S, Sevilla R, Ortiz R. Assessing variation in Peruvian highland  
663 maize: tassel, kernel and ear descriptors. *Plant Genet Resour Newsltr*. 2004;137:34–41.
- 664 [36] Ortiz R, Crossa J, Sevilla R. Minimum resources for phenotyping morphological traits of maize (*Zea  
665 mays* L.) genetic resources. *Plant Genetic Resources*. 2008;6(3):195–200.
- 666 [37] Lin TY, Maire M, Belongie S, Hays J, Perona P, Ramanan D, et al. Microsoft COCO: Common objects in  
667 context. In: *European Conference on Computer Vision*. Springer; 2014. p. 740–755.
- 668 [38] Yu Y, Zhang K, Yang L, Zhang D. Fruit detection for strawberry harvesting robot in non-structural envi-  
669 ronment based on Mask-RCNN. *Computers and Electronics in Agriculture*. 2019;163:104846.
- 670 [39] Ganesh P, Volle K, Burks T, Mehta S. Deep orange: Mask R-CNN based orange detection and segmen-  
671 tation. *IFAC-PapersOnLine*. 2019;52(30):70–75.
- 672 [40] Zhao T, Yang Y, Niu H, Wang D, Chen Y. Comparing U-Net convolutional network with mask R-CNN  
673 in the performances of pomegranate tree canopy segmentation. In: *Multispectral, Hyperspectral, and  
674 Ultraspectral Remote Sensing Technology, Techniques and Applications VII*. vol. 10780. International  
675 Society for Optics and Photonics; 2018. p. 107801J.
- 676 [41] Ren S, He K, Girshick R, Sun J. Faster R-CNN: towards real-time object detection with region proposal  
677 networks. *IEEE transactions on pattern analysis and machine intelligence*. 2016;39(6):1137–1149.
- 678 [42] Dias PA, Shen Z, Tabb A, Medeiros H. FreeLabel: A Publicly Available Annotation Tool based on Free-  
679 hand Traces. *arXiv:190206806 [cs]*. 2019 Feb;ArXiv: 1902.06806.
- 680 [43] Bradski G. The OpenCV Library. *Dr Dobb's Journal of Software Tools*. 2000;.
- 681 [44] Van Rossum G, Drake FL. *Python 3 Reference Manual*. Scotts Valley, CA: CreateSpace; 2009.
- 682 [45] Abadi M, Agarwal A, Barham P, Brevdo E, Chen Z, Citro C, et al.. *TensorFlow: Large-Scale Machine  
683 Learning on Heterogeneous Systems*; 2015. Software available from [tensorflow.org](http://tensorflow.org). Available from:  
684 <http://tensorflow.org/>.
- 685 [46] Chollet F, et al.. *Keras*; 2015. <https://keras.io>.
- 686 [47] He K, Gkioxari G, Dollár P, Girshick R. Mask R-CNN. In: *Proceedings of the IEEE international confer-  
687 ence on computer vision*; 2017. p. 2961–2969.
- 688 [48] R Core Team. *R: A Language and Environment for Statistical Computing*. Vienna, Austria; 2020.
- 689 [49] Felzenszwalb PF, Huttenlocher DP. Efficient graph-based image segmentation. *International Journal of  
690 Computer Vision*. 2004;59(2):167–181.

- 691 [50] Walt Svd, Schönberger JL, Nunez-Iglesias J, Boulogne F, Warner JD, Yager N, et al. scikit-image: image  
692 processing in Python. *PeerJ*. 2014 Jun;2:e453. Publisher: PeerJ Inc.
- 693 [51] Gehan MA, Fahlgren N, Abbasi A, Berry JC, Callen ST, Chavez L, et al. PlantCV v2: Image analysis  
694 software for high-throughput plant phenotyping. *PeerJ*. 2017 Dec;5:e4088.
- 695 [52] Le Cun Y, Jackel LD, Boser B, Denker JS, Graf HP, Guyon I, et al. Handwritten digit recognition: Applica-  
696 tions of neural network chips and automatic learning. *IEEE Communications Magazine*. 1989;27(11):41-  
697 46.
- 698 [53] Krizhevsky A, Sutskever I, Hinton GE. Imagenet classification with deep convolutional neural networks.  
699 *Advances in neural information processing systems*. 2012;25:1097–1105.
- 700 [54] Cap Q, Suwa K, Fujita E, Uga H, Kagiwada S, Iyatomi H. An end-to-end practical plant disease di-  
701 agnosis system for wide-angle cucumber images. *International Journal of Engineering & Technology*.  
702 2018;7(4.11):106–111.
- 703 [55] Alkhudaydi T, Reynolds D, Griffiths S, Zhou J, De La Iglesia B, et al. An exploration of deep-learning  
704 based phenotypic analysis to detect spike regions in field conditions for UK bread wheat. *Plant Phe-  
705 nomics*. 2019;2019:7368761.
- 706 [56] Girshick R, Donahue J, Darrell T, Malik J. Rich feature hierarchies for accurate object detection and  
707 semantic segmentation. In: *Proceedings of the IEEE conference on computer vision and pattern recog-  
708 nition*; 2014. p. 580–587.
- 709 [57] Girshick R. Fast r-cnn. In: *Proceedings of the IEEE international conference on computer vision*; 2015.  
710 p. 1440–1448.
- 711 [58] Dutta A, Zisserman A. The VIA Annotation Software for Images, Audio and Video. In: *Proceedings of  
712 the 27th ACM International Conference on Multimedia*. MM '19. New York, NY, USA: ACM; 2019. .
- 713 [59] Jaccard P. Étude comparative de la distribution florale dans une portion des Alpes et des Jura. *Bull Soc  
714 Vaudoise Sci Nat*. 1901;37:547–579.
- 715 [60] Everingham M, Van Gool L, Williams CK, Winn J, Zisserman A. The Pascal visual object classes (VOC)  
716 challenge. *International Journal of Computer Vision*. 2010;88(2):303–338.
- 717 [61] Russakovsky O, Deng J, Su H, Krause J, Satheesh S, Ma S, et al. Imagenet large scale visual recognition  
718 challenge. *International Journal of Computer Vision*. 2015;115(3):211–252.
- 719 [62] He K, Zhang X, Ren S, Sun J. Deep residual learning for image recognition. In: *Proceedings of the IEEE  
720 conference on computer vision and pattern recognition*; 2016. p. 770–778.
- 721 [63] Metrics of COCO Dataset;. Accessed: 2021-02-19. <https://cocodataset.org/#detection-eval>.
- 722 [64] Stoddard MC, Yong EH, Akkaynak D, Sheard C, Tobias JA, Mahadevan L. Avian egg shape: Form,  
723 function, and evolution. *Science*. 2017;356(6344):1249–1254.
- 724 [65] Baker DE. A geometric method for determining shape of bird eggs. *The Auk*. 2002;119(4):1179–1186.
- 725 [66] Maechler M, Rousseeuw P, Struyf A, Hubert M, Hornik K. cluster: Cluster Analysis Basics and Exten-  
726 sions; 2019. R package version 2.1.0.
- 727 [67] Kassambara A, Mundt F. Factoextra: extract and visualize the results of multivariate data analyses. R  
728 package version 107. 2020;.
- 729 [68] Tibshirani R, Walther G, Hastie T. Estimating the number of clusters in a data set via the gap statistic.  
730 *Journal of the Royal Statistical Society: Series B (Statistical Methodology)*. 2001;63(2):411–423.
